# Supplementary material for: Terbium and Europium Chlorocyananilate-Based 2D Coordination Polymers
Source: MDPI journal article supplement (doi:10.3390/molecules28186453), 2023-09-06
Supplement: s1 [file s1]

# Terbium and Europium Chlorocyananilate-Based 2D Coordination Polymers

Mariangela Oggianu <sup>1,2</sup>, Alexandre Abhervé <sup>3</sup>, Daniela Marongiu <sup>4</sup>, Francesco Quochi <sup>2,4</sup>,  
José Ramón Galán-Mascarós <sup>5,6</sup>, Federica Bertolotti <sup>7</sup>, Norberto Masciocchi <sup>2,7</sup>, Narcis Avarvari <sup>3,\*</sup>  
and Maria Laura Mercuri <sup>1,2,\*</sup>

<sup>1</sup> Department of Chemical and Geological Sciences, University of Cagliari, Highway 554, Crossroads for Sestu, I-09042 Monserrato, Italy; mariangela.oggianu@unica.it

<sup>2</sup> National Interuniversity Consortium of Materials Science and Technology, INSTM, Street Giuseppe Giusti, 9, I-50121 Florence, Italy

<sup>3</sup> Laboratoire MOLTECH-Anjou UMR 6200, UFR Sciences, CNRS, Université d'Angers, Bât. K, 2 Bd. Lavoisier, I-49045 Angers, France; alexandre.abherve@univ-angers.fr

<sup>4</sup> Department of Physics, University of Cagliari, Highway 554, Crossroads for Sestu, I-09042 Monserrato, Italy; dmarongiu@dsf.unica.it; quochi@unica.it (F.Q.)

<sup>5</sup> Institute of Chemical Research of Catalonia (ICIQ-CERCA), Barcelona Institute of Science and Technology (BIST), Avenida Països Catalans 16, 43007 Tarragona, Spain; jrgalan@iciq.es

<sup>6</sup> ICREA, Av. Lluís Companys 16, *Passeig Lluís Companys*, 23, 08010 Barcelona, Spain

<sup>7</sup> Dipartimento di Scienza e Alta Tecnologia & To.Sca.Lab., University of Insubria, Via Valleggio 11, I-22100 Como, Italy; federica.bertolotti@uninsubria.it (F.B.); norberto.masciocchi@uninsubria.it (N.M.).

\* Correspondence: narcis.avarvari@univ-angers.fr (N.A.); mercuri@unica.it (M.L.M.);  
Tel.: +33-241-735-084 (N.A.); +39-070-675-4474 (M.L.M.); Fax: +33-02-41-73-5405 (N.A.);  
+39-070-675-4486 (M.L.M.)

Table S1.

---

Crystal data for compound 2,  $\text{Eu}_2(\text{ClCNAn})_3(\text{DMSO})_6$ , derived from XRPD analysis.

---

Cell             $a = 9.704(1)$ ,     $b = 9.710(1)$ ,     $c = 14.146(1)$  Å,  
                  $\alpha = 84.003(6)$ ,     $\beta = 97.145(6)$ ,     $\gamma = 78.526(5)$  °

Cell Volume:  $V = 1284.6(4)$  Å<sup>3</sup>

Crystal System: Triclinic

Space Group: P-1

---

Fractional atomic coordinated for compound 4,  $\text{Eu}_2(\text{ClCNAn})_3(\text{DMSO})_6$ , derived from XRPD analysis.

---

|      |    |   |          |   |         |   |         |
|------|----|---|----------|---|---------|---|---------|
| site | Eu | x | 0.67059  | y | 0.76545 | z | 0.27392 |
| site | C1 | x | -0.07873 | y | 0.38790 | z | 0.50553 |
| site | C2 | x | -0.12233 | y | 0.50257 | z | 0.43207 |
| site | C3 | x | -0.03870 | y | 0.62163 | z | 0.42620 |
| site | O1 | x | -0.22912 | y | 0.50832 | z | 0.37124 |

|      |      |   |          |   |          |   |          |
|------|------|---|----------|---|----------|---|----------|
| site | O2   | x | -0.07763 | y | 0.72401  | z | 0.36061  |
| site | C7   | x | -0.15747 | y | 0.27580  | z | 0.51105  |
| site | N1   | x | -0.21991 | y | 0.18690  | z | 0.51544  |
| site | C11  | x | -0.17376 | y | 0.25261  | z | 0.51220  |
| site | C1a  | x | 0.61443  | y | -0.09135 | z | 0.56767  |
| site | C2a  | x | 0.52954  | y | 0.02603  | z | 0.59701  |
| site | C3a  | x | 0.40801  | y | 0.12304  | z | 0.52513  |
| site | O1a  | x | 0.55240  | y | 0.05208  | z | 0.68153  |
| site | O2a  | x | 0.33221  | y | 0.22784  | z | 0.55132  |
| site | C7a  | x | 0.72887  | y | -0.18269 | z | 0.63534  |
| site | N1a  | x | 0.81963  | y | -0.25514 | z | 0.68902  |
| site | C11a | x | 0.75254  | y | -0.20159 | z | 0.64935  |
| site | C1b  | x | 0.63944  | y | 0.01629  | z | -0.01963 |
| site | C2b  | x | 0.51787  | y | 0.08608  | z | -0.08370 |
| site | C3b  | x | 0.36977  | y | 0.06878  | z | -0.06285 |
| site | O1b  | x | 0.52953  | y | 0.16243  | z | -0.15783 |
| site | O2b  | x | 0.26122  | y | 0.13109  | z | -0.12006 |
| site | C7b  | x | 0.77889  | y | 0.03258  | z | -0.03926 |
| site | N1b  | x | 0.88948  | y | 0.04550  | z | -0.05483 |
| site | C11b | x | 0.80774  | y | 0.03595  | z | -0.04332 |
| site | O01  | x | 0.50419  | y | 0.37178  | z | 2.70007  |
| site | S1   | x | 0.60409  | y | 0.49576  | z | 2.71327  |
| site | C01  | x | 0.52443  | y | 0.61892  | z | 2.78177  |
| site | C02  | x | 0.77372  | y | 0.41248  | z | 2.77096  |
| site | H011 | x | 0.51888  | y | 0.57145  | z | 2.84295  |
| site | H012 | x | 0.58026  | y | 0.68821  | z | 2.78915  |
| site | H013 | x | 0.43168  | y | 0.66280  | z | 2.74975  |
| site | H021 | x | 0.81548  | y | 0.34496  | z | 2.73310  |
| site | H022 | x | 0.82954  | y | 0.48176  | z | 2.77833  |
| site | H023 | x | 0.76658  | y | 0.36632  | z | 2.83221  |
| site | O11  | x | -3.70193 | y | 2.40385  | z | 0.83920  |
| site | S2   | x | -3.85967 | y | 2.43946  | z | 0.88188  |
| site | C11  | x | -3.97327 | y | 2.58137  | z | 0.80738  |
| site | C12  | x | -3.93354 | y | 2.29014  | z | 0.88297  |
| site | H111 | x | -3.98777 | y | 2.55674  | z | 0.74420  |
| site | H112 | x | -4.06142 | y | 2.60127  | z | 0.83123  |
| site | H113 | x | -3.93119 | y | 2.66176  | z | 0.80698  |
| site | H121 | x | -3.87002 | y | 2.21339  | z | 0.92336  |
| site | H122 | x | -4.02169 | y | 2.31005  | z | 0.90682  |
| site | H123 | x | -3.94829 | y | 2.26737  | z | 0.81930  |
| site | O21  | x | -5.27933 | y | 1.98208  | z | 0.28941  |

|      |      |   |          |   |         |   |         |
|------|------|---|----------|---|---------|---|---------|
| site | S3   | x | -5.12803 | y | 2.04603 | z | 0.29802 |
| site | C21  | x | -5.04815 | y | 2.01645 | z | 0.41759 |
| site | C22  | x | -5.01344 | y | 1.95861 | z | 0.22756 |
| site | H211 | x | -5.02605 | y | 1.91743 | z | 0.43887 |
| site | H212 | x | -4.96360 | y | 2.05219 | z | 0.42240 |
| site | H213 | x | -5.11221 | y | 2.06396 | z | 0.45524 |
| site | H221 | x | -5.05876 | y | 1.97490 | z | 0.16268 |
| site | H222 | x | -4.92889 | y | 1.99435 | z | 0.23238 |
| site | H223 | x | -4.99156 | y | 1.85996 | z | 0.25006 |

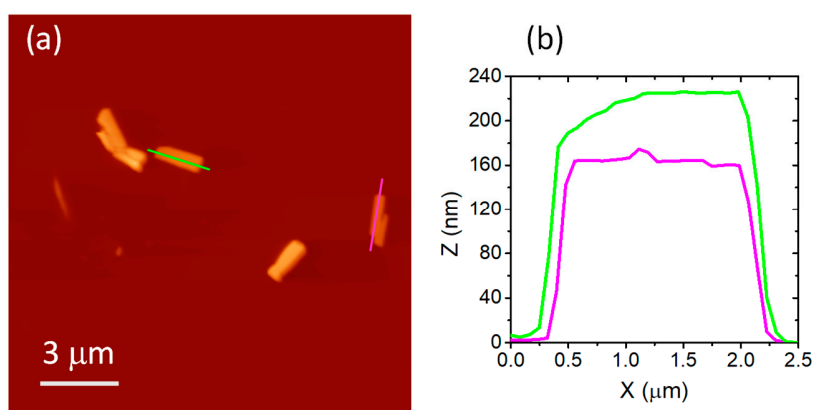

**Figure S1.** (a) AFM topographic image showing exfoliation products of **1** with heights ranging in the hundreds of nanometers. (b) Height profiles obtained along the lines drawn in panel (a).
